# Supplementary material for: pFAK-Y397 overexpression as both a prognostic and a predictive biomarker for patients with metastatic osteosarcoma
Source: PubMed Central journal article supplement (PMC5573209; doi:10.1371/journal.pone.0182989), 2017-08-28
Supplement: pone.0182989.s001.pdf [file pone.0182989.s001.pdf]

**S1 Table. Relationships between clinicopathologic characteristics and total FAK, pFAK-Y397 expression in primary osteosarcoma tissues of patients without metastatic osteosarcoma at diagnosis.** (non-overexpression = negative or weak or moderate expression)

| Characteristics                   | Total FAK expression         |                           |                      | pFAK-Y397 expression          |                           |                      |
|-----------------------------------|------------------------------|---------------------------|----------------------|-------------------------------|---------------------------|----------------------|
|                                   | Non-over<br>(n = 4)<br>n (%) | Over<br>(n = 30)<br>n (%) | P value <sup>c</sup> | Non-over<br>(n = 13)<br>n (%) | Over<br>(n = 21)<br>n (%) | P value <sup>c</sup> |
| Age at diagnosis                  |                              |                           |                      |                               |                           |                      |
| ≤ 15 yrs                          | 3 (8.8)                      | 18 (52.9)                 | 1.000                | 10 (29.4)                     | 11 (32.4)                 | 0.276                |
| > 15 yrs                          | 1 (2.9)                      | 12 (35.3)                 |                      | 3 (8.8)                       | 10 (29.4)                 |                      |
| Gender                            |                              |                           |                      |                               |                           |                      |
| Male                              | 4 (11.8)                     | 15 (44.1)                 | 0.113                | 9 (26.5)                      | 10 (29.4)                 | 0.217                |
| Female                            | 0 (0.0)                      | 15 (44.1)                 |                      | 4 (11.8)                      | 11 (32.4)                 |                      |
| Site of tumor                     |                              |                           |                      |                               |                           |                      |
| Femur                             | 3 (8.8)                      | 18 (52.9)                 | 1.000                | 7 (20.6)                      | 14 (41.2)                 | 0.491                |
| Tibia or fibula or others         | 1 (2.9)                      | 12 (35.3)                 |                      | 6 (17.6)                      | 7 (20.6)                  |                      |
| Histologic subtype                |                              |                           |                      |                               |                           |                      |
| Non osteoblastic                  | 2 (5.9)                      | 15 (44.1)                 | 1.000                | 7 (20.6)                      | 10 (29.4)                 | 0.724                |
| Osteoblastic                      | 2 (5.9)                      | 15 (44.1)                 |                      | 6 (17.6)                      | 11 (32.4)                 |                      |
| Primary tumor volume <sup>a</sup> |                              |                           |                      |                               |                           |                      |
| < 500 mL                          | 2 (6.9)                      | 19 (65.5)                 | 1.000                | 8 (27.6)                      | 13 (44.8)                 | 1.000                |
| ≥ 500 mL                          | 1 (3.4)                      | 7 (24.1)                  |                      | 3 (10.3)                      | 5 (17.2)                  |                      |
| Histologic response <sup>b</sup>  |                              |                           |                      |                               |                           |                      |
| Good                              | 4 (17.4)                     | 7 (30.4)                  | 0.037*               | 7 (30.4)                      | 4 (17.4)                  | 0.009*               |
| Poor                              | 0 (0.0)                      | 12 (52.2)                 |                      | 1 (4.3)                       | 11 (47.8)                 |                      |

<sup>a</sup> Evaluated only in 29 patients (5 patients, no preoperative MRI).

<sup>b</sup> Evaluated only in 23 patients who received neoadjuvant chemotherapy (3 patients, no neoadjuvant chemotherapy; 1 patients, no chemotherapy; 7 patients, no data).

<sup>c</sup> P value determined using the Pearson Chi-square test or Fisher's exact test.

\* Statistically significant.
