# Supplementary material for: pFAK-Y397 overexpression as both a prognostic and a predictive biomarker for patients with metastatic osteosarcoma
Source: PubMed Central journal article supplement (PMC5573209; doi:10.1371/journal.pone.0182989), 2017-08-28
Supplement: pone.0182989.s002.pdf [file pone.0182989.s002.pdf]

**S2 Table. Kaplan-Meier survival analyses for overall survival of patients without metastatic osteosarcoma at diagnosis.**

| Characteristics                                    | <i>n</i> | Mean months<br>(95% CI) | <i>P</i> value <sup>c</sup> |
|----------------------------------------------------|----------|-------------------------|-----------------------------|
| Age at diagnosis                                   |          |                         |                             |
| ≤ 15 yrs                                           | 21       | 82 (60.4 – 104.1)       | 0.005*                      |
| > 15 yrs                                           | 13       | 28 (18.1 – 38.4)        |                             |
| Gender                                             |          |                         |                             |
| Male                                               | 19       | 75 (51.9 – 98.4)        | 0.135                       |
| Female                                             | 15       | 49 (25.7 – 72.1)        |                             |
| Site of tumor                                      |          |                         |                             |
| Femur                                              | 21       | 72 (47.9 – 96.4)        | 0.722                       |
| Tibia or fibula or others                          | 13       | 56 (34.8 – 77.2)        |                             |
| Histologic subtype                                 |          |                         |                             |
| Non osteoblastic                                   | 17       | 82 (57.2 – 106.8)       | 0.052                       |
| Osteoblastic                                       | 17       | 44 (24.5 – 64.1)        |                             |
| Primary tumor volume <sup>a</sup>                  |          |                         |                             |
| < 500 mL                                           | 21       | 75 (52.4 – 97.4)        | 0.138                       |
| ≥ 500 mL                                           | 8        | 32 (13.9 – 50.5)        |                             |
| Histologic response <sup>b</sup>                   |          |                         |                             |
| Good                                               | 11       | 99 (71.1 – 126.2)       | 0.127                       |
| Poor                                               | 12       | 58 (37.3 – 77.9)        |                             |
| Chemotherapy                                       |          |                         |                             |
| Both neoadjuvant & adjuvant                        | 23       | 86 (65.7 – 106.1)       | <0.0001*                    |
| Either neoadjuvant or adjuvant, or no chemotherapy | 11       | 19 (10.5 – 28.1)        |                             |
| Total FAK expression                               |          |                         |                             |
| Non-over                                           | 4        | 76 (25.6 – 126.6)       | 0.634                       |
| Over                                               | 30       | 58 (41.7 – 74.7)        |                             |
| pFAK-Y397 expression                               |          |                         |                             |
| Non-over                                           | 13       | 72 (44.0 – 100.7)       | 0.557                       |
| Over                                               | 21       | 54 (34.6 – 74.1)        |                             |
| Total FAK/pFAK-Y397 co-expression                  |          |                         |                             |
| Non-over/non-over                                  | 4        | 76 (25.6 – 126.6)       | 0.820                       |
| Over/non-over                                      | 9        | 58 (32.6 – 83.4)        |                             |
| Over/over                                          | 21       | 54 (34.6 – 74.1)        |                             |

CI, confidence interval.

<sup>a</sup> Evaluated only in 29 patients (5 patients, no preoperative MRI).

<sup>b</sup> Evaluated only in 23 patients who received neoadjuvant chemotherapy (3 patients, no neoadjuvant chemotherapy; 1 patients, no chemotherapy; 7 patients, no data).

<sup>c</sup> Log rank (Mantel-Cox) test.

\* Statistically significant.
