# Supplementary material for: pFAK-Y397 overexpression as both a prognostic and a predictive biomarker for patients with metastatic osteosarcoma
Source: PubMed Central journal article supplement (PMC5573209; doi:10.1371/journal.pone.0182989), 2017-08-28
Supplement: pone.0182989.s003.pdf [file pone.0182989.s003.pdf]

**S3 Table. Univariate Cox regression analyses for overall survival of all patients with osteosarcoma, and for overall survival and post metastases overall survival of patients with osteosarcoma presented with metastases at diagnosis or developed metastases during treatment/follow-up.**

| Characteristics                                                                                 | All patients with osteosarcoma<br>(n = 53) |       |               | Patients with metastatic osteosarcoma (n = 33) |       |               |         |       |               |
|-------------------------------------------------------------------------------------------------|--------------------------------------------|-------|---------------|------------------------------------------------|-------|---------------|---------|-------|---------------|
|                                                                                                 | OS                                         |       |               | OS                                             |       |               | PMOS    |       |               |
|                                                                                                 | P value                                    | HR    | 95% CI        | P value                                        | HR    | 95% CI        | P value | HR    | 95% CI        |
| Age at diagnosis, > 18 yrs vs ≤ 18 yrs <sup>a</sup>                                             | 0.016*                                     | 2.595 | 1.192 – 5.648 | 0.070                                          | 2.341 | 0.934 – 5.869 | 0.017*  | 3.319 | 1.244 – 8.855 |
| Gender, female vs male                                                                          | 0.780                                      | 1.103 | 0.554 – 2.197 | 0.486                                          | 1.389 | 0.551 – 3.504 | 0.393   | 1.493 | 0.595 – 3.747 |
| Site of tumor, tibia or fibula or others vs femur                                               | 0.328                                      | 1.382 | 0.723 – 2.640 | 0.662                                          | 1.178 | 0.565 – 2.457 | 0.212   | 1.598 | 0.765 – 3.338 |
| Histologic subtype, osteoblastic vs non osteoblastic                                            | 0.106                                      | 1.720 | 0.891 – 3.323 | 0.145                                          | 1.734 | 0.828 – 3.631 | 0.453   | 1.332 | 0.630 – 2.813 |
| Primary tumor volume, ≥ 500 mL vs < 500 mL                                                      | 0.003*                                     | 3.150 | 1.471 – 6.744 | 0.081                                          | 2.216 | 0.906 – 5.422 | 0.378   | 1.476 | 0.622 – 3.503 |
| Presence of metastasis at diagnosis, yes vs no                                                  | 0.001*                                     | 3.181 | 1.641 – 6.167 | 0.041*                                         | 2.207 | 1.032 – 4.719 | 0.882   | 1.060 | 0.491 – 2.288 |
| Time to metastases, at diagnosis vs ≤ 12 months vs > 12 months                                  |                                            |       |               | 0.014*                                         | 1.769 | 1.124 – 2.786 | 0.646   | 1.115 | 0.701 – 1.772 |
| Site of metastases, bone or multiple organs vs lung only                                        |                                            |       |               | 0.057                                          | 2.303 | 0.977 – 5.430 | 0.025*  | 2.811 | 1.136 – 6.951 |
| Histologic response, poor vs good                                                               | 0.031*                                     | 3.070 | 1.110 – 8.489 | 0.384                                          | 1.646 | 0.536 – 5.052 | 0.425   | 1.585 | 0.512 – 4.913 |
| Chemotherapy, either neoadjuvant or adjuvant, or no chemotherapy vs both neoadjuvant & adjuvant | <0.0001*                                   | 3.774 | 1.934 – 7.364 | 0.138                                          | 1.774 | 0.832 – 3.782 | 0.188   | 1.669 | 0.778 – 3.582 |
| Total FAK expression, over vs non-over                                                          | 0.453                                      | 1.574 | 0.482 – 5.140 | 0.958                                          | 0.962 | 0.225 – 4.115 | 0.962   | 1.036 | 0.243 – 4.419 |
| pFAK-Y397 expression, over vs non-over                                                          | 0.261                                      | 1.486 | 0.745 – 2.963 | 0.048*                                         | 2.323 | 1.006 – 5.362 | 0.034*  | 2.601 | 1.072 – 6.307 |
| Total FAK/pFAK-Y397 co-expression, over/over vs over/non-over vs non-over/non-over              | 0.250                                      | 1.355 | 0.807 – 2.274 | 0.120                                          | 1.751 | 0.864 – 3.551 | 0.091   | 1.879 | 0.904 – 3.903 |

CI, confidence interval; HR, hazard ratio; OS, overall survival; PMOS, post metastases overall survival.

<sup>a</sup> Patients with metastases, > 21 yrs vs ≤ 21 yrs (the mean value of age at diagnosis).

\* Statistically significant.
