# Supplementary material for: pFAK-Y397 overexpression as both a prognostic and a predictive biomarker for patients with metastatic osteosarcoma
Source: PubMed Central journal article supplement (PMC5573209; doi:10.1371/journal.pone.0182989), 2017-08-28
Supplement: pone.0182989.s004.pdf [file pone.0182989.s004.pdf]

**S4 Table. Univariate and multivariate Cox regression analyses for overall survival of patients without metastatic osteosarcoma at diagnosis.**

| Characteristics                                                                                 | <i>P</i> value | HR    | 95% CI         |
|-------------------------------------------------------------------------------------------------|----------------|-------|----------------|
| Univariate                                                                                      |                |       |                |
| Age at diagnosis, > 15 yrs vs ≤ 15 yrs                                                          | 0.009*         | 3.659 | 1.390 – 9.633  |
| Gender, female vs male                                                                          | 0.143          | 1.965 | 0.796 – 4.851  |
| Site of tumor, tibia or fibula or others vs femur                                               | 0.722          | 1.179 | 0.476 – 2.920  |
| Histologic subtype, osteoblastic vs non osteoblastic                                            | 0.059          | 2.468 | 0.965 – 6.314  |
| Primary tumor volume, ≥ 500 mL vs < 500 mL                                                      | 0.149          | 2.277 | 0.745 – 6.962  |
| Histologic response, poor vs good                                                               | 0.143          | 2.798 | 0.707 – 11.073 |
| Chemotherapy, either neoadjuvant or adjuvant, or no chemotherapy vs both neoadjuvant & adjuvant | <0.00005*      | 8.719 | 3.073 – 24.732 |
| Total FAK expression, over vs non-over                                                          | 0.636          | 1.427 | 0.327 – 6.227  |
| pFAK-Y397 expression, over vs non-over                                                          | 0.558          | 1.328 | 0.514 – 3.434  |
| Total FAK/pFAK-Y397 co-expression, over/over vs over/non-over vs non-over/non-over              | 0.530          | 1.241 | 0.632 – 2.435  |
| Multivariate                                                                                    |                |       |                |
| Age at diagnosis, > 15 yrs vs ≤ 15 yrs                                                          | 0.086          | 2.410 | 0.884 – 6.571  |
| Chemotherapy, either neoadjuvant or adjuvant, or no chemotherapy vs both neoadjuvant & adjuvant | 0.0004*        | 6.893 | 2.360 – 20.136 |

CI, confidence interval; HR, hazard ratio.

\* Statistically significant.
